# Supplementary material
Source: PubMed Central journal article supplement (PMC4787683)
Supplement: mcld782771.ww2_default.pdf [file mcld782771.ww2_default.pdf]

**Appendix 2 Amount of missing data by randomised group [posted as supplied by author]**

|                                                                                           | <b>eSET<br/>N=683<br/>n (%)</b> | <b>DET<br/>N=684<br/>n (%)</b> | <b>Total<br/>N=1367<br/>n (%)</b> |
|-------------------------------------------------------------------------------------------|---------------------------------|--------------------------------|-----------------------------------|
| Female age                                                                                | 3 (0.4)                         | 2 (0.3)                        | 5 (0.4)                           |
| Female BMI                                                                                | 115 (16.8)                      | 110 (16.1)                     | 225 (16.5)                        |
| Type of infertility for female (primary or secondary)                                     | 15 (2.2)                        | 13 (1.9)                       | 28 (2.1)                          |
| Duration of infertility                                                                   | 17 (2.5)                        | 16 (2.3)                       | 33 (2.4)                          |
| Primary cause of infertility                                                              | 2 (0.3)                         | 2 (0.3)                        | 4 (0.3)                           |
| Type of treatment (first cycle)                                                           | 0 (0.0)                         | 1 (0.1)                        | 1 (0.1)                           |
| Number of fresh embryos available for transfer (first cycle)                              | 0 (0.0)                         | 2 (0.3)                        | 2 (0.1)                           |
| Day of fresh embryo transfer (first cycle)                                                | 1 (0.1)                         | 4 (0.6)                        | 5 (0.4)                           |
| Developmental stage of each fresh embryo transferred (first cycle) <sup>1</sup> , n/N (%) | 31/685 (4.5)                    | 64/1359 (4.7)                  | 95/2044 (4.6)                     |
| Grade of each fresh embryo transferred (first cycle) <sup>1</sup> , n/N (%)               | 32/685 (4.7)                    | 67/1359 (4.9)                  | 99/2044 (4.8)                     |
| Live birth (first cycle)                                                                  | 0 (0.0)                         | 1 (0.1)                        | 1 (0.1)                           |
| Multiple live birth (first cycle)                                                         | 0 (0.0)                         | 1 (0.1)                        | 1 (0.1)                           |
| Gestation period for live birth (first cycle) <sup>2</sup> , n/N (%)                      | 0/181 (0.0)                     | 2/285 (0.7)                    | 2/466 (0.4)                       |
| Birth weight for live birth (first cycle) <sup>2</sup> , n/N (%)                          | 0/181 (0.0)                     | 2/285 (0.7)                    | 2/466 (0.4)                       |

Denominator is the number of women unless otherwise stated.

<sup>1</sup> Denominator is the number of embryos transferred. <sup>2</sup> Denominator is the number of live births.

BMI Body Mass Index
