# Supplementary material
Source: PubMed Central journal article supplement (PMC4787683)
Supplement: mcld782771.ww3_default.pdf [file mcld782771.ww3_default.pdf]

**Appendix 3 Characteristics of couples at randomisation by trial [posted as supplied by author]**

|                                                | <b>Davies 2003<br/>(N=27)</b> | <b>Bhattacharya<br/>2006<br/>(N=24)</b> | <b>Gerris 1999<br/>(N=53)</b> | <b>Lukassen 2005<br/>(N=108)</b> | <b>Martikainen<br/>2001<br/>(N=144)</b> | <b>Thurin 2004<br/>(N=661)</b> | <b>Thurin 2005<br/>(N=42)</b> | <b>van Montfoort<br/>2006<br/>(N=308)</b> |
|------------------------------------------------|-------------------------------|-----------------------------------------|-------------------------------|----------------------------------|-----------------------------------------|--------------------------------|-------------------------------|-------------------------------------------|
| Female age in years, median (IQR)              | 30.9 (29.0, 33.1)             | 31.2 (29.2, 34.4)                       | 28.2 (26.0, 30.9)             | 31.3 (29.3, 32.9)                | 31.1 (28.3, 33.9)                       | 31.0 (28.7, 33.5)              | 38.0 (36.8, 38.5)             | 32.5 (30.4, 34.7)                         |
| Missing n (%)                                  | 0 (0.0)                       | 0 (0.0)                                 | 0 (0.0)                       | 0 (0.0)                          | 0 (0.0)                                 | 1 (0.2)                        | 4 (9.5)                       | 0 (0.0)                                   |
| Female BMI in kg/m <sup>2</sup> , median (IQR) | 24.3 (22.7, 28.5)             | 26.5 (23.5, 29.5)                       | 23.2 (22.5, 23.9)             | 22.2 (20.5, 25.1)                | 22.0 (20.0, 24.5)                       | 23.4 (21.5, 26.4)              | 24.1 (21.4, 26.2)             | 23.8 (21.7, 26.2)                         |
| Missing n (%)                                  | 4 (14.8)                      | 0 (0.0)                                 | 50 (94.3)                     | 25 (23.1)                        | 0 (0.0)                                 | 3 (0.5)                        | 1 (2.4)                       | 142 (46.1)                                |
| Type of infertility, n (%)                     |                               |                                         |                               |                                  |                                         |                                |                               |                                           |
| Primary                                        | 7 (25.9)                      | 4 (16.7)                                | 33 (62.3)                     | 78 (72.2)                        | 120 (83.3)                              | 480 (72.6)                     | 25 (59.5)                     | 249 (80.8)                                |
| Secondary                                      | 14 (51.9)                     | 20 (83.3)                               | 9 (17.0)                      | 30 (27.8)                        | 15 (10.4)                               | 181 (27.4)                     | 15 (35.7)                     | 59 (19.2)                                 |
| Missing                                        | 6 (22.2)                      | 0 (0.0)                                 | 11 (20.8)                     | 0 (0.0)                          | 9 (6.3)                                 | 0 (0.0)                        | 2 (4.8)                       | 0 (0.0)                                   |
| Duration of infertility in years, median (IQR) | 5.3 (2.3, 7.5)                | 4.0 (3.1, 4.5)                          | 1.5 (1.0, 2.5)                | 3.2 (2.2, 4.2)                   | 3.0 (2.0, 4.4)                          | 3.0 (3.0, 4.0)                 | 4.0 (3.0, 5.0)                | 3.0 (2.1, 4.2)                            |
| Missing n (%)                                  | 6 (22.2)                      | 0 (0.0)                                 | 14 (26.4)                     | 0 (0.0)                          | 6 (4.2)                                 | 5 (0.8)                        | 0 (0.0)                       | 2 (0.6)                                   |
| Primary cause of infertility, n (%)            |                               |                                         |                               |                                  |                                         |                                |                               |                                           |
| Male                                           | 16 (59.3)                     | 5 (20.8)                                | 27 (50.9)                     | 58 (53.7)                        | 50 (34.7)                               | 215 (32.5)                     | 9 (21.4)                      | 176 (57.1)                                |
| Female                                         | 7 (25.9)                      | 4 (16.7)                                | 5 (9.4)                       | 20 (18.5)                        | 52 (36.1)                               | 183 (27.7)                     | 15 (35.7)                     | 61 (19.8)                                 |
| Unexplained                                    | 2 (7.4)                       | 6 (25.0)                                | 8 (15.1)                      | 20 (18.5)                        | 21 (14.6)                               | 111 (16.8)                     | 11 (26.2)                     | 71 (23.1)                                 |
| Mixed/Other                                    | 0 (0.0)                       | 9 (37.5)                                | 13 (24.5)                     | 10 (9.3)                         | 21 (14.6)                               | 151 (22.8)                     | 6 (14.3)                      | 0 (0.0)                                   |
| Missing                                        | 2 (7.4)                       | 0 (0.0)                                 | 0 (0.0)                       | 0 (0.0)                          | 0 (0.0)                                 | 1 (0.2)                        | 1 (2.4)                       | 0 (0.0)                                   |

BMI Body Mass Index

IQR Interquartile range
